# Supplementary figures and images for: Naturally mutagenic sequence diversity in a human type II topoisomerase
Source: PubMed Central journal article supplement — Proc Natl Acad Sci U S A. 2023 Jul 5;120(28):e2302064120. doi: 10.1073/pnas.2302064120 (PMC10334734; doi:10.1073/pnas.2302064120), 2023-07-05

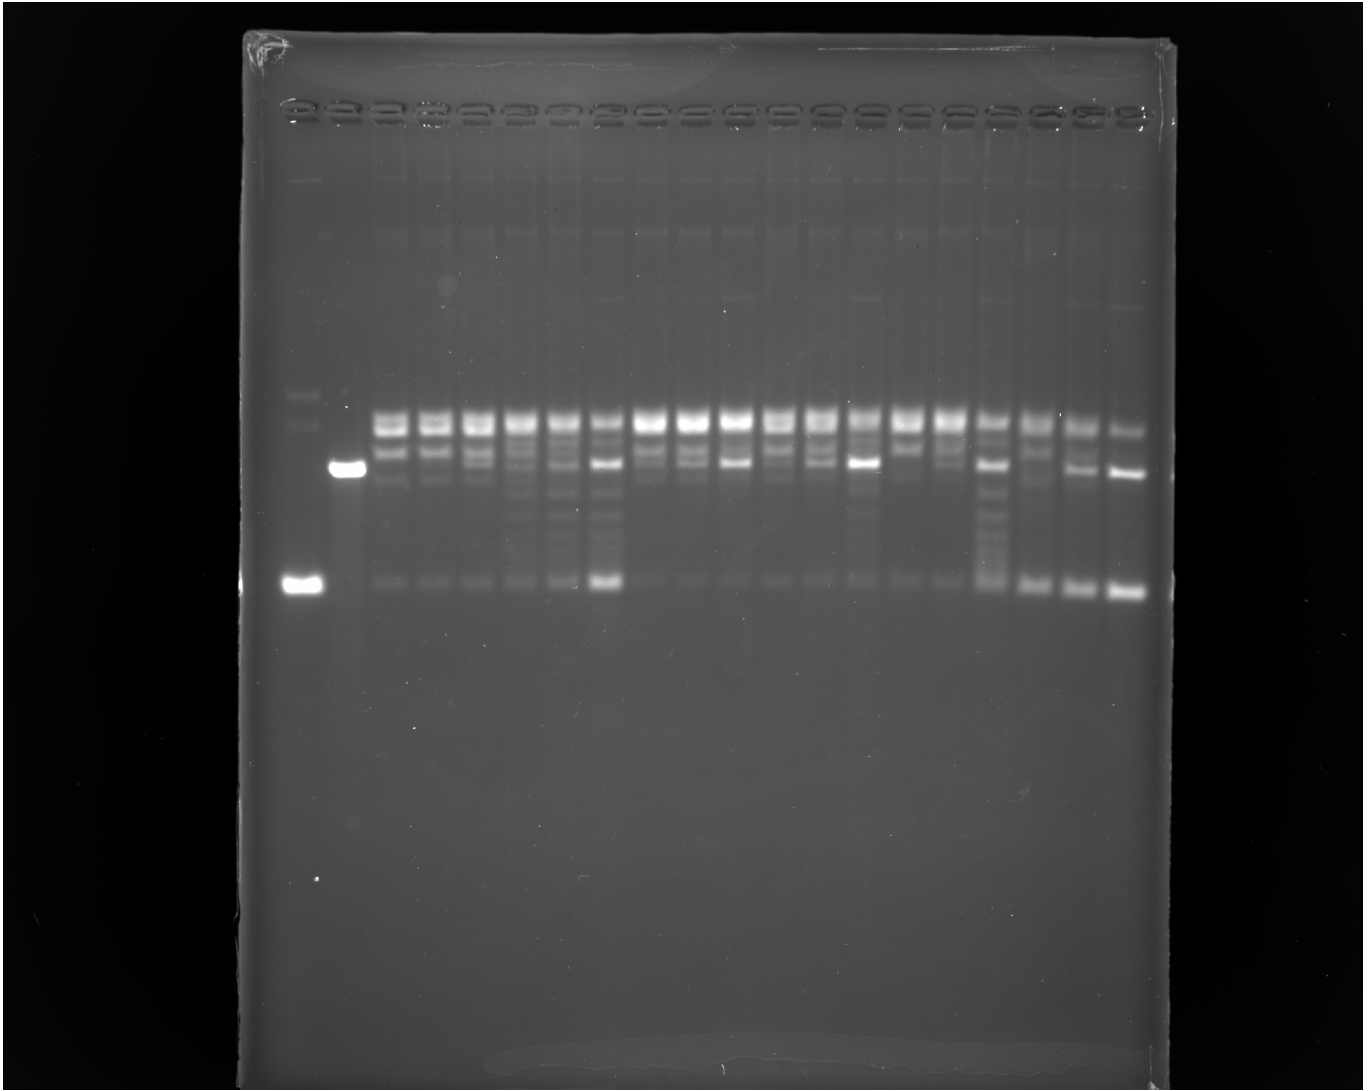

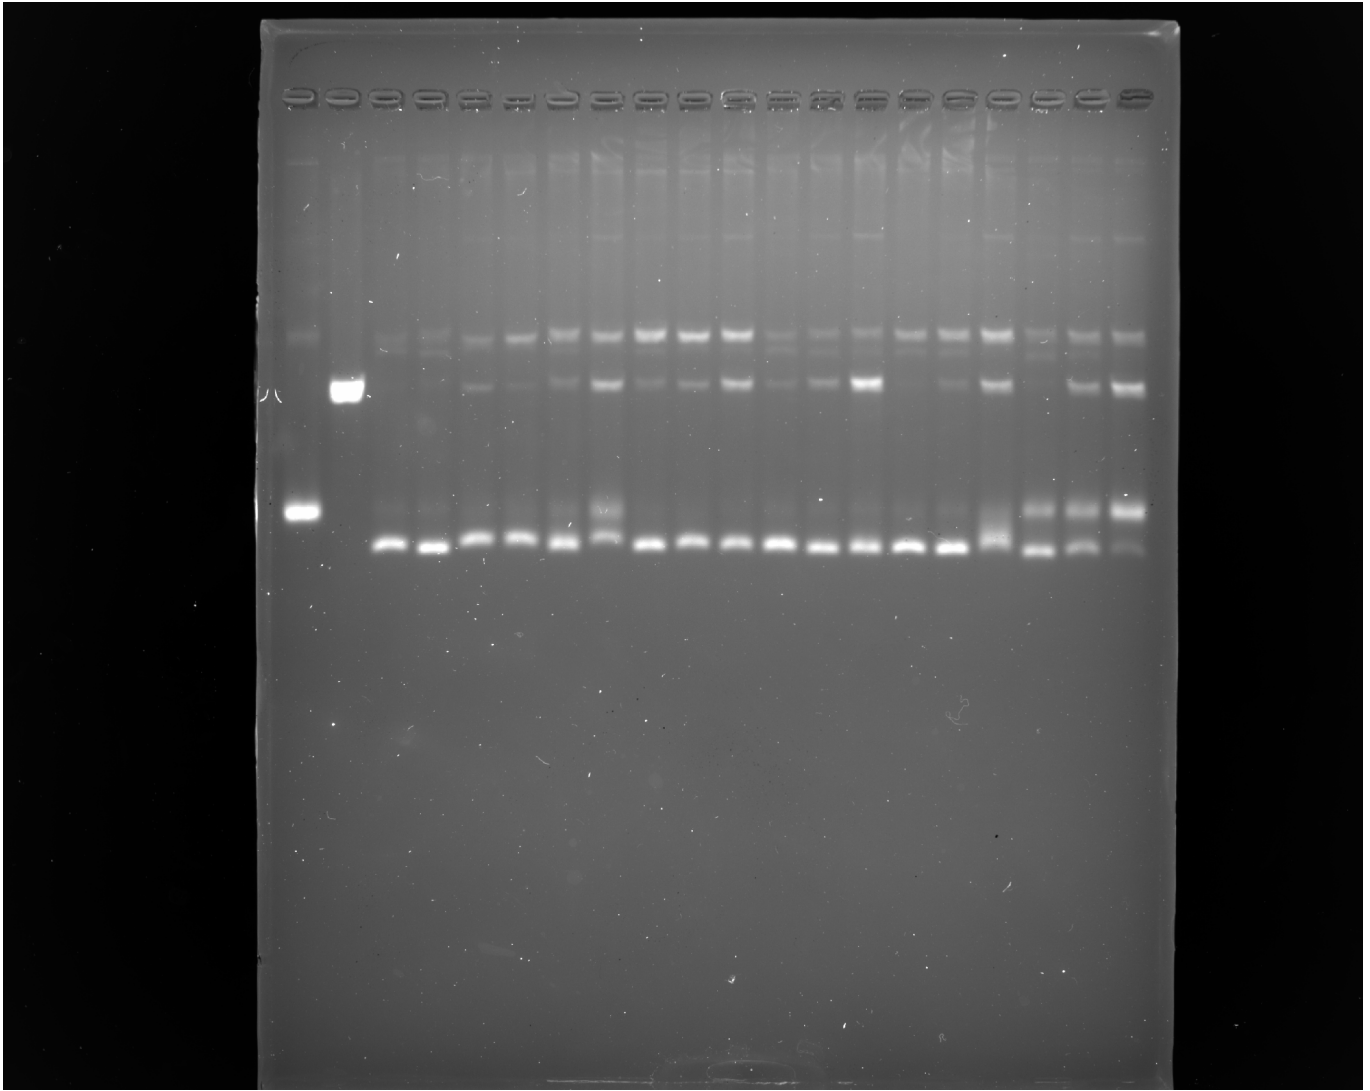



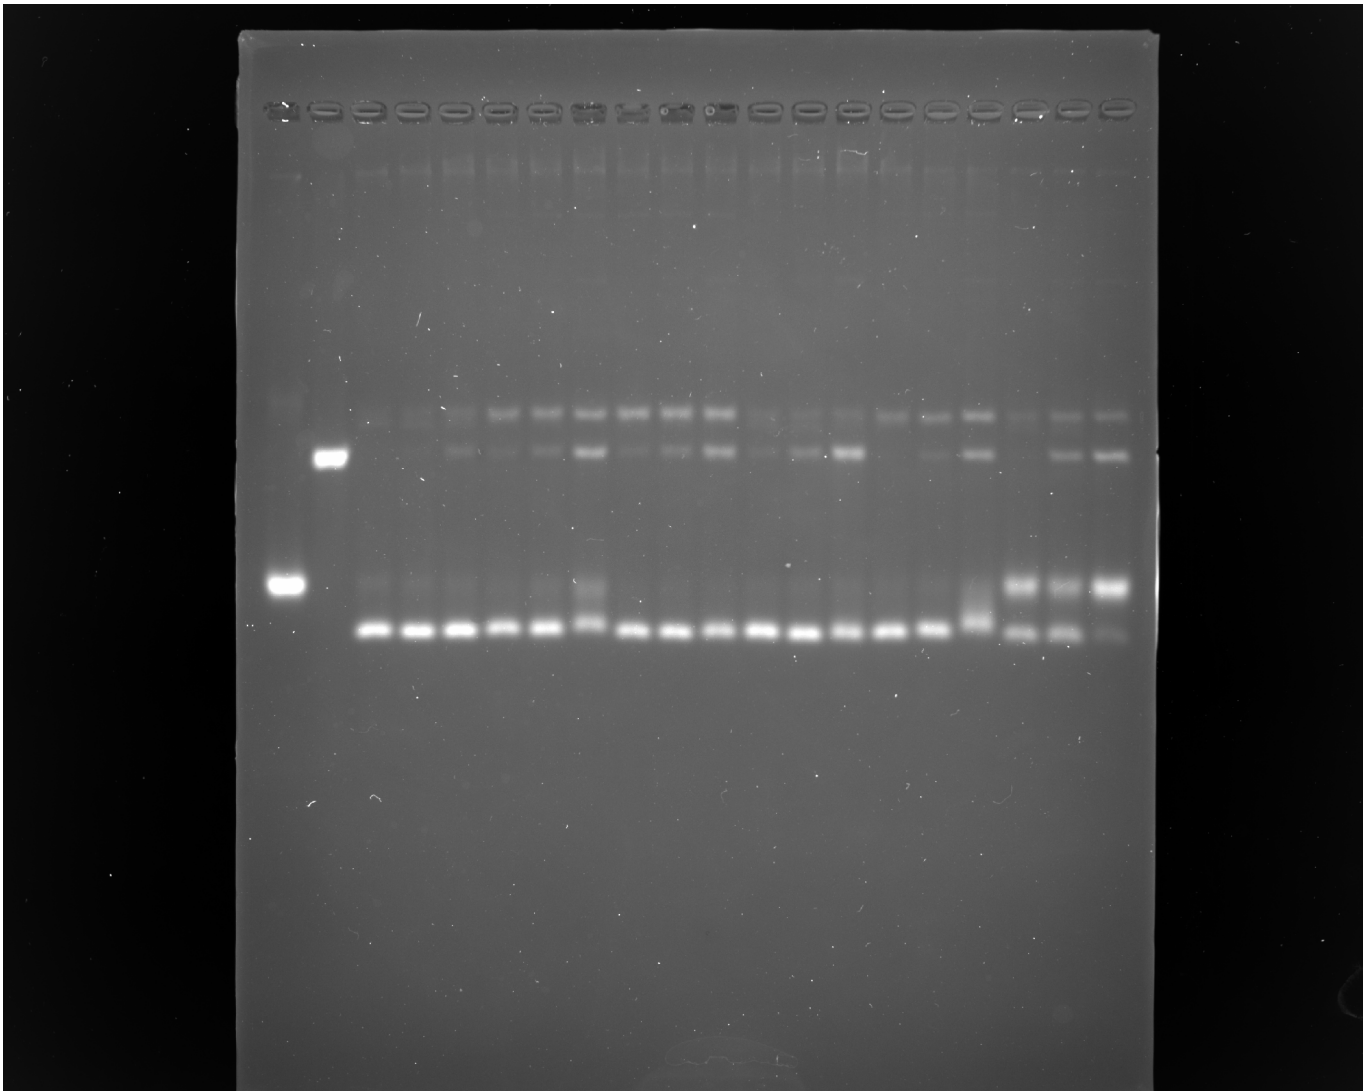

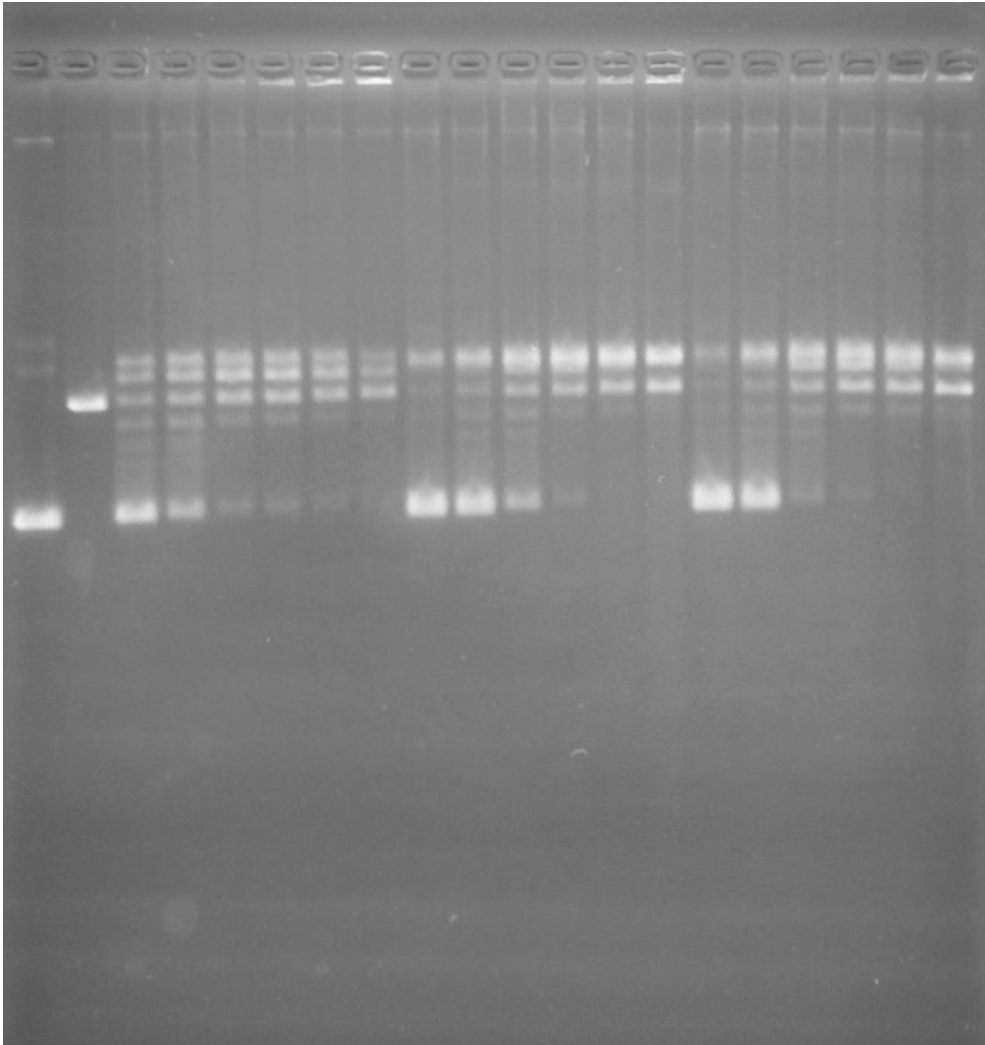

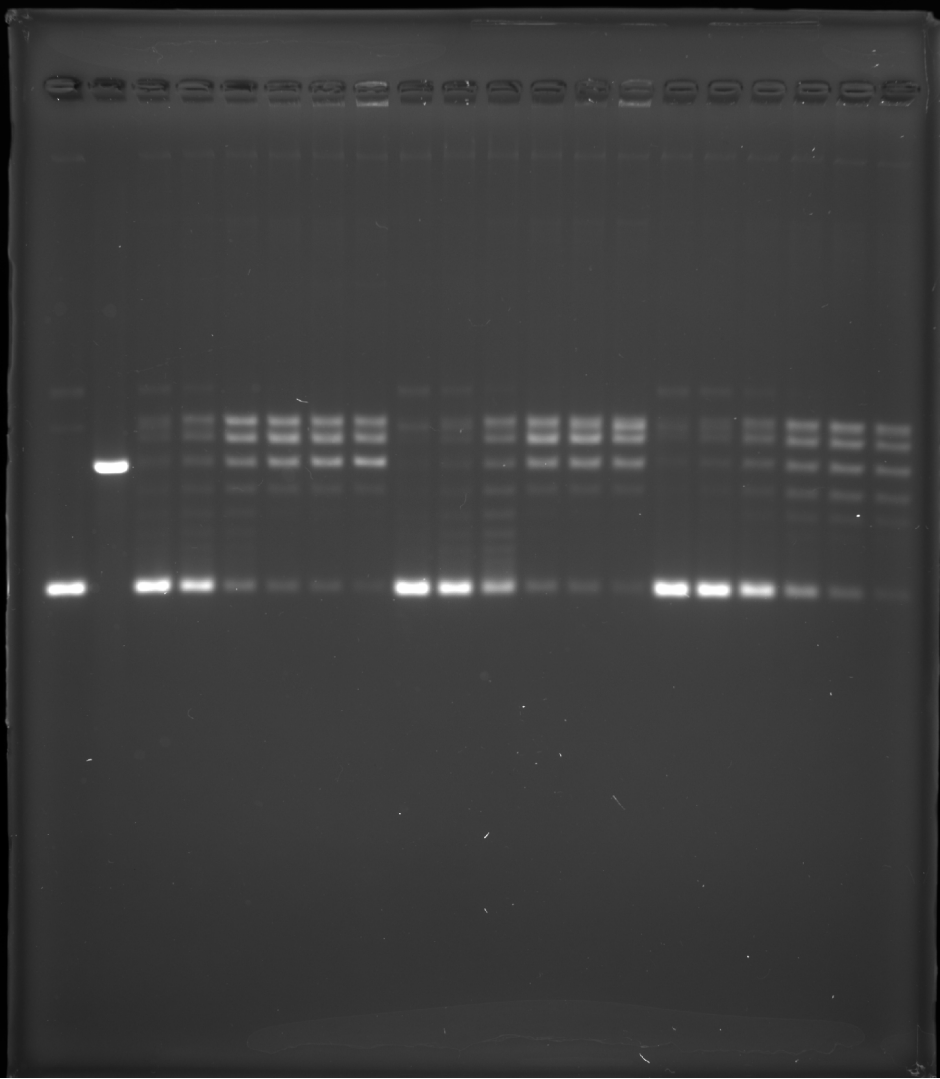

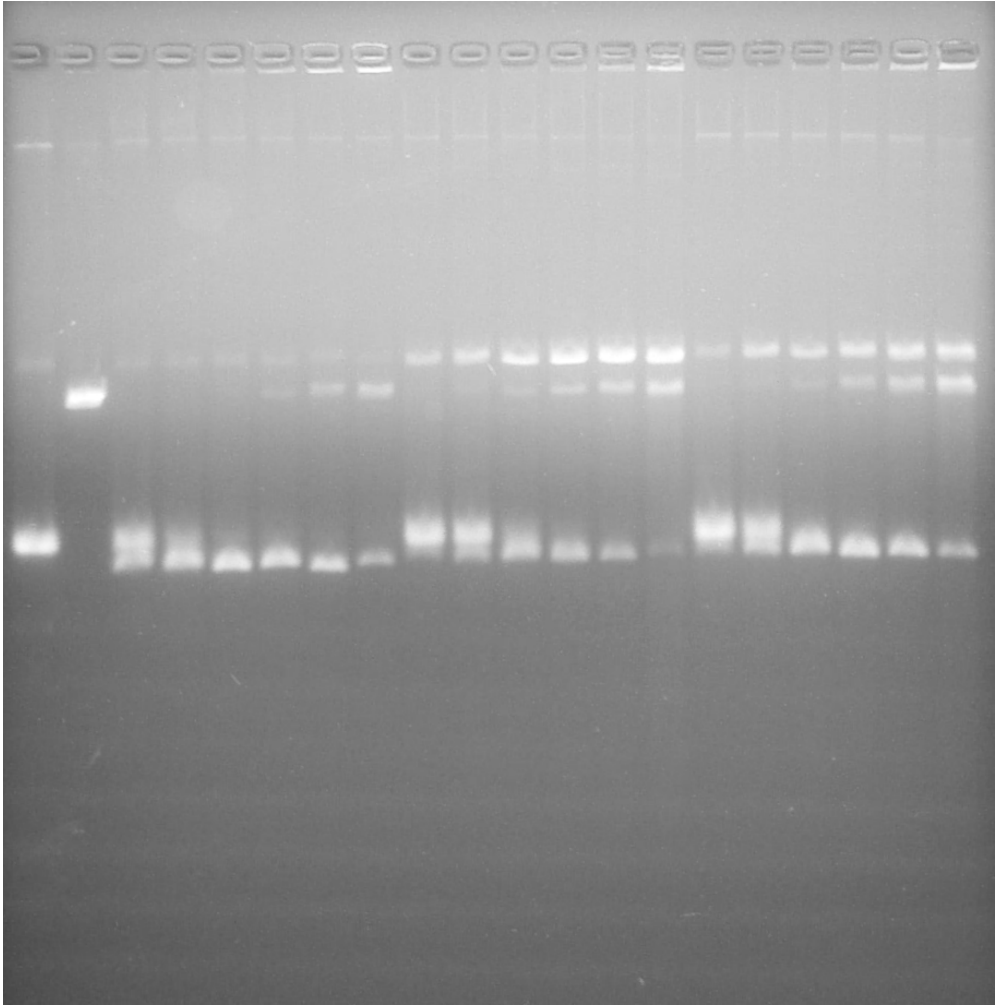

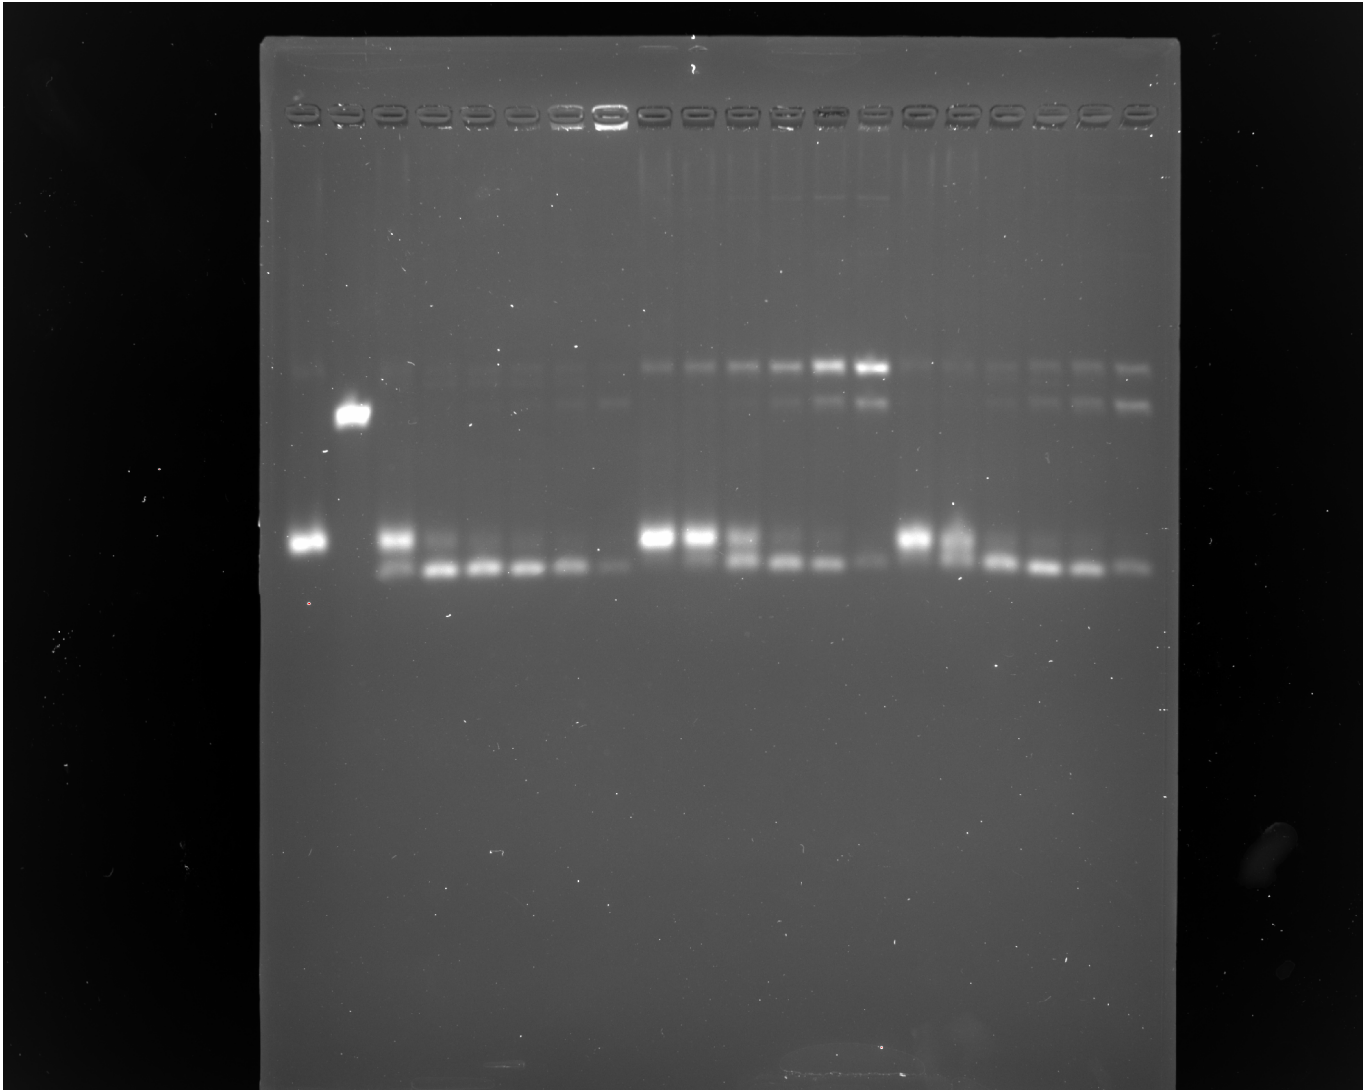



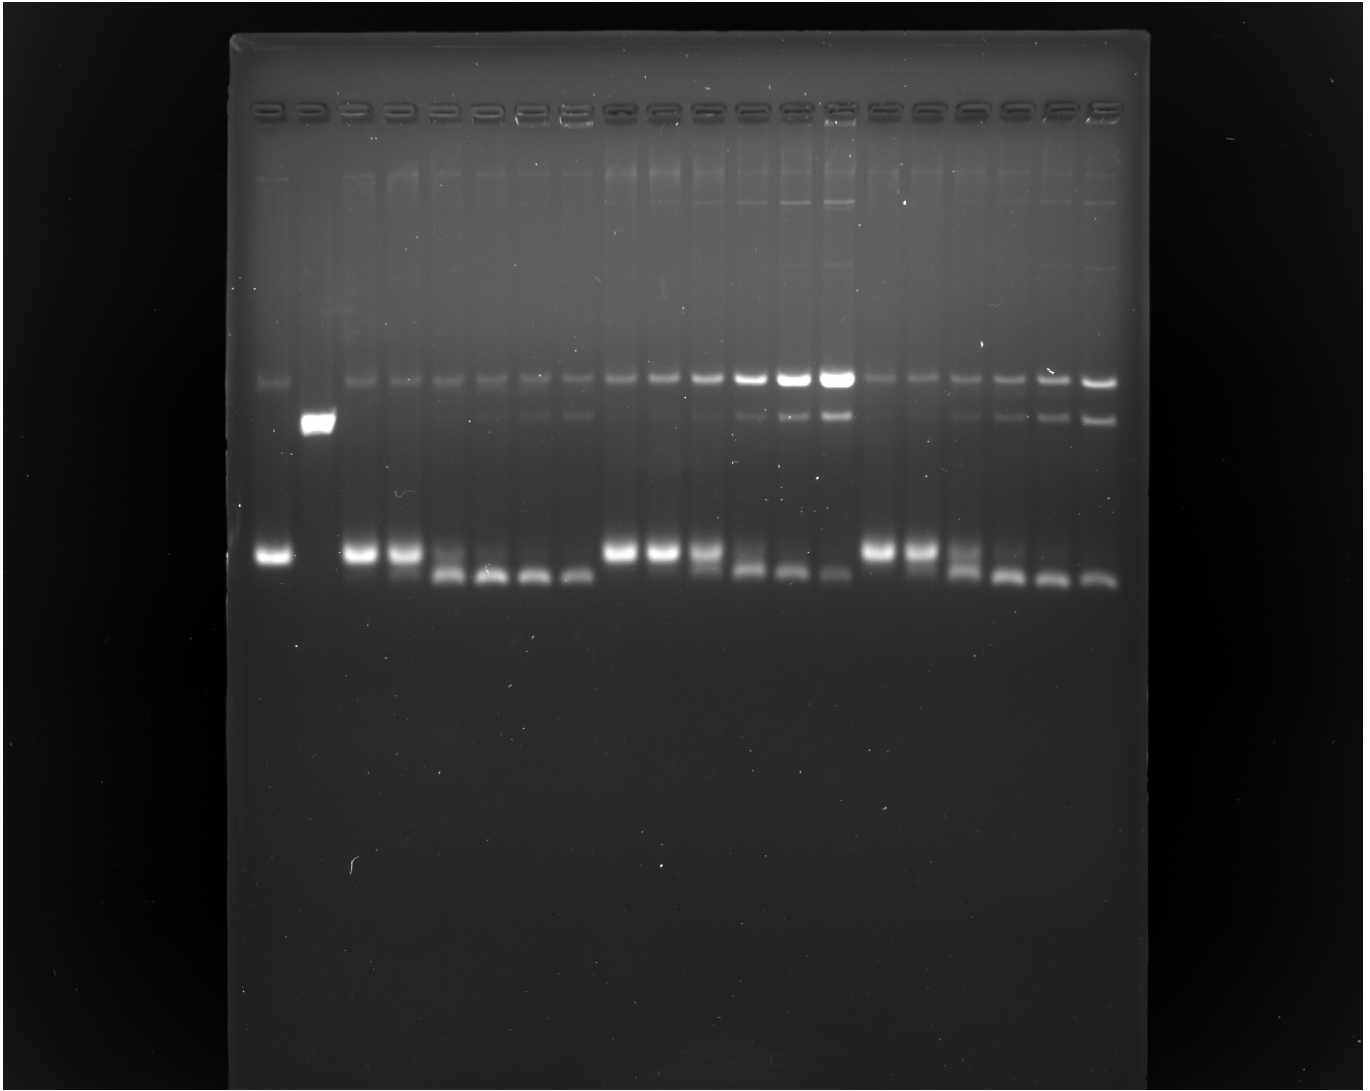

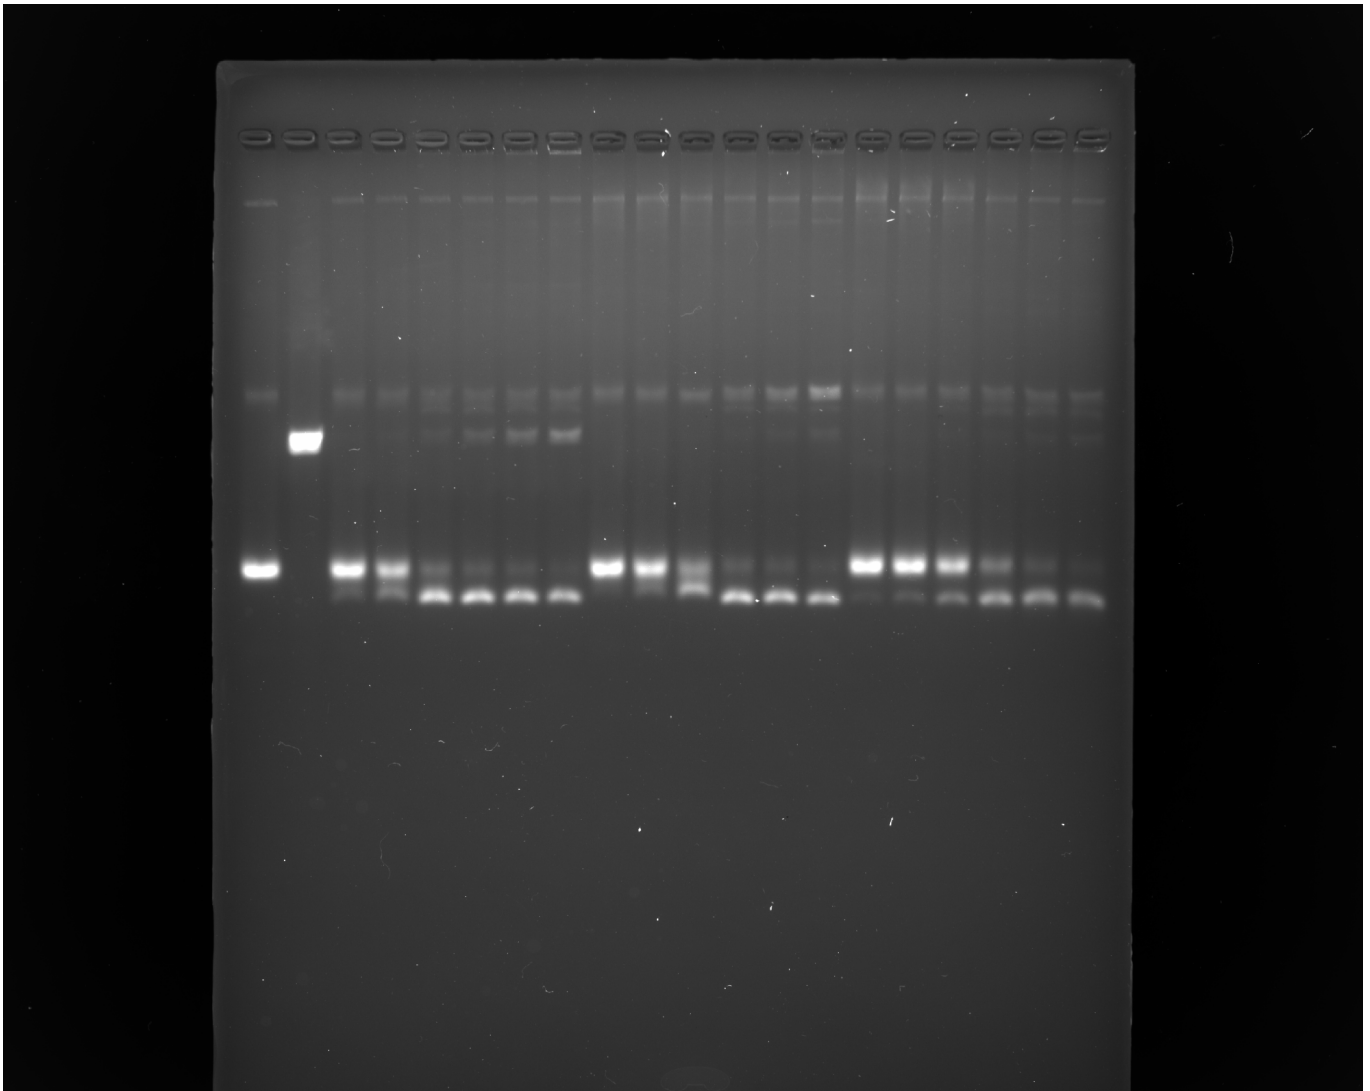

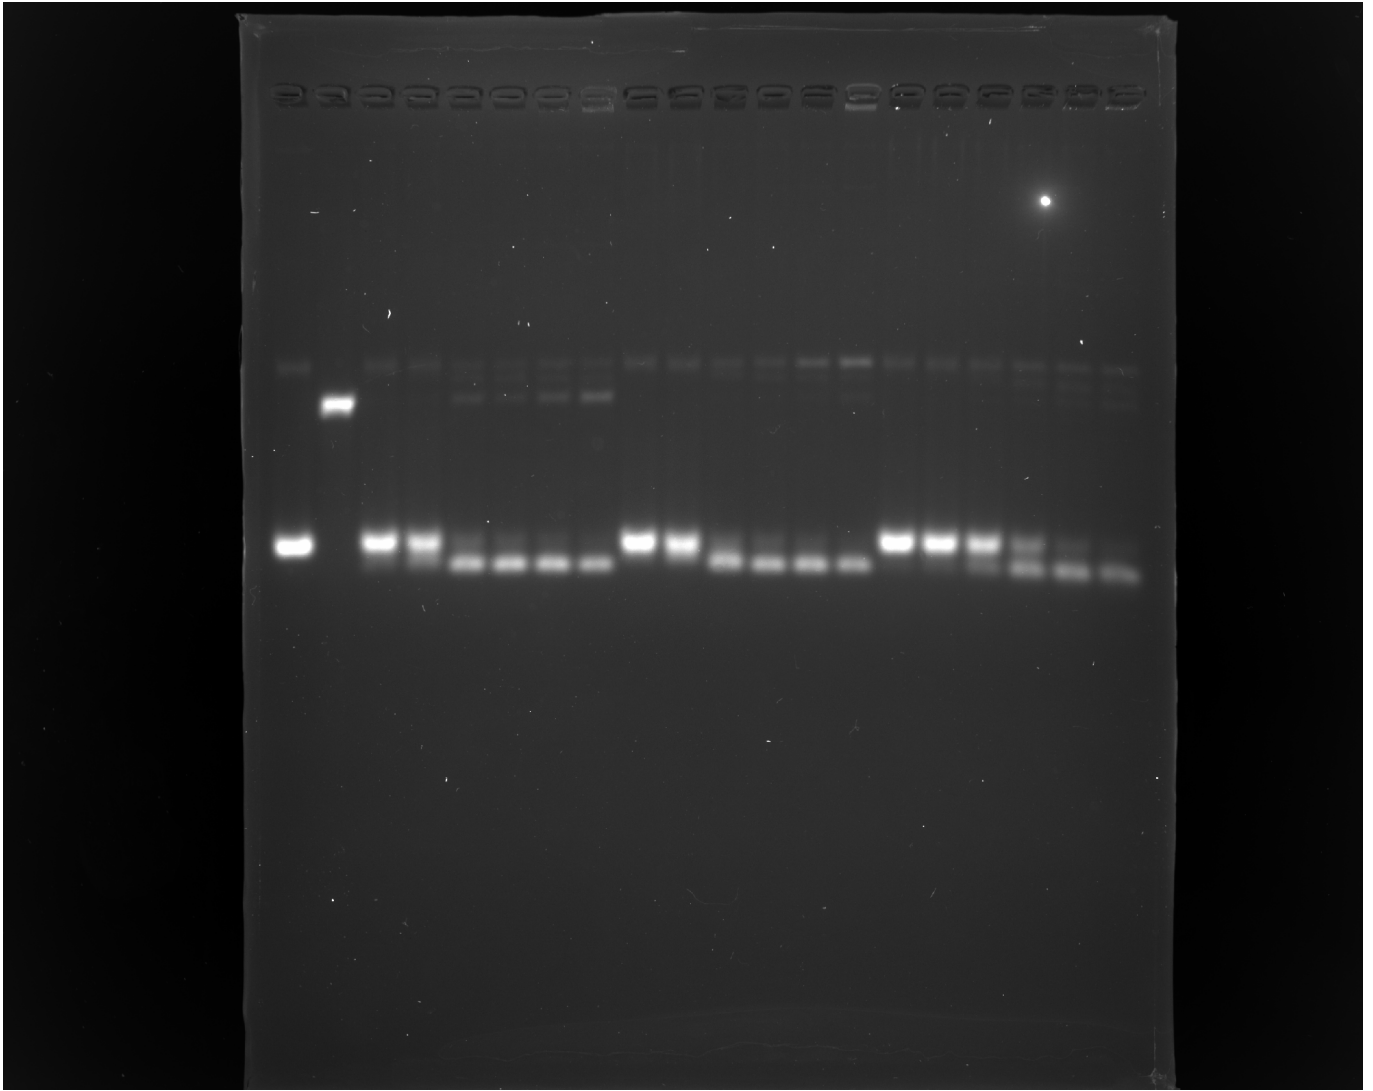

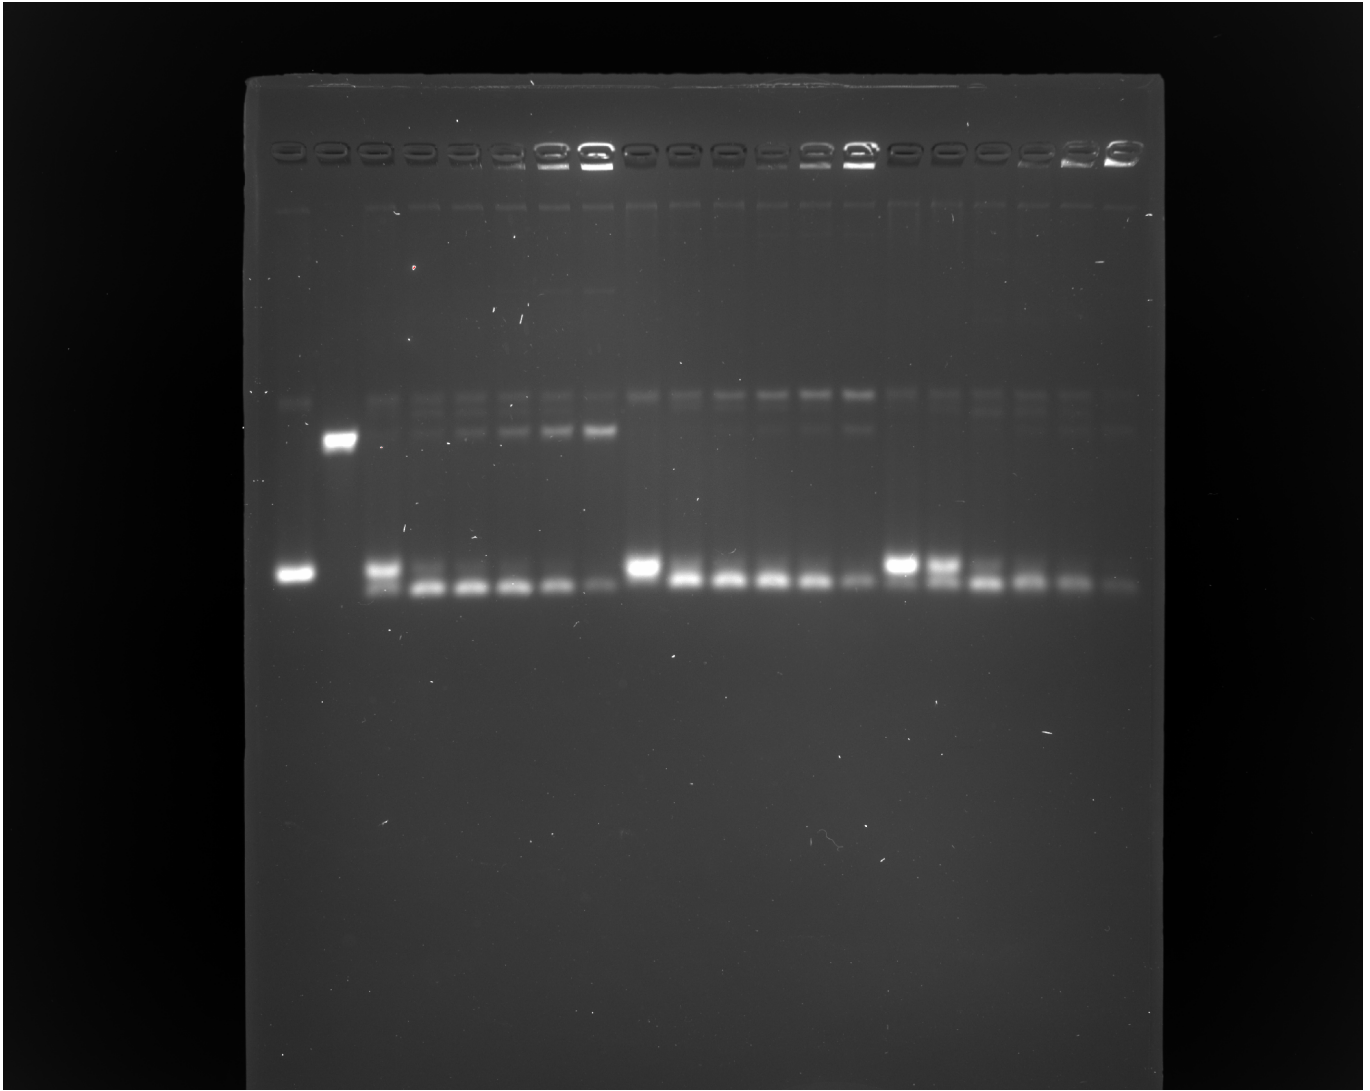

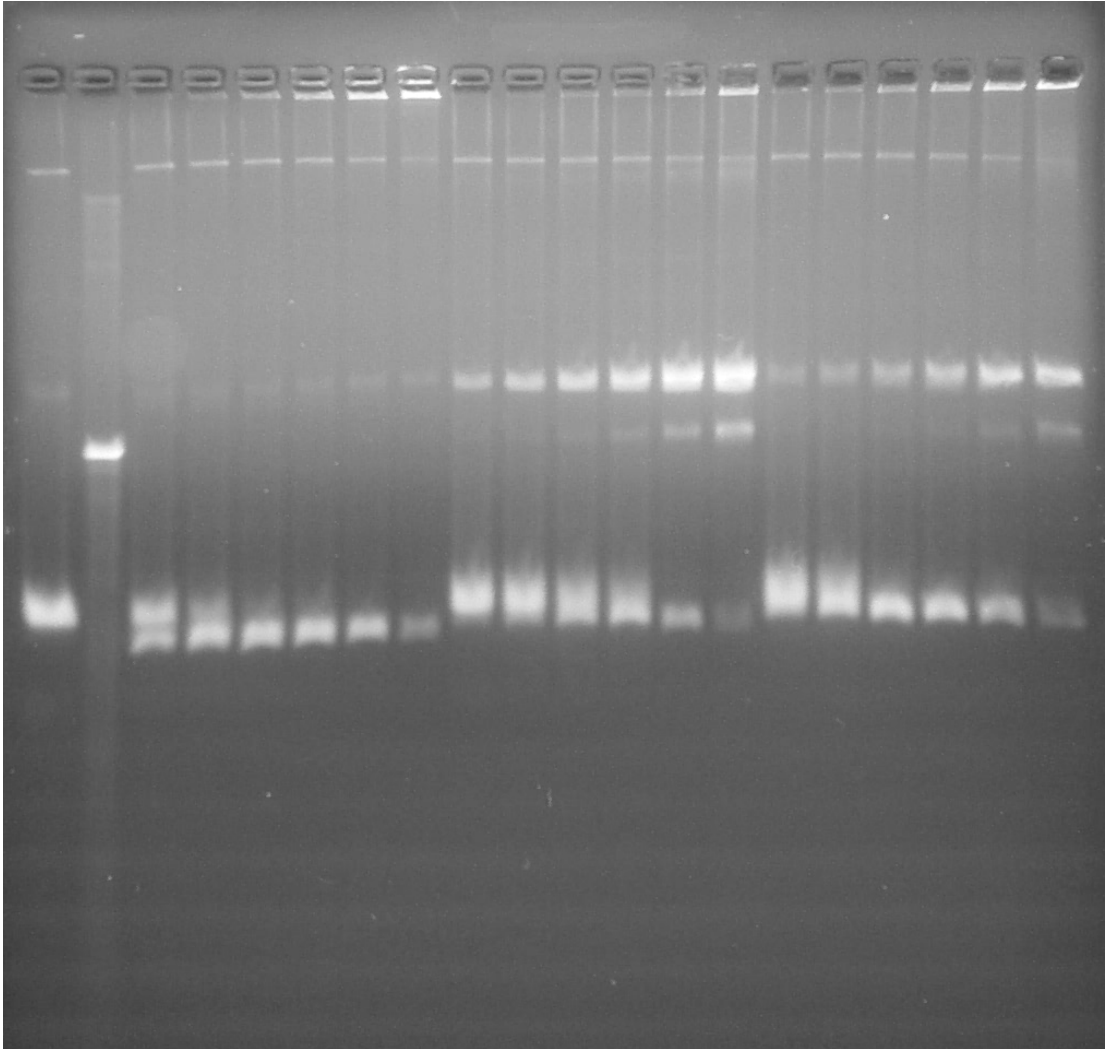

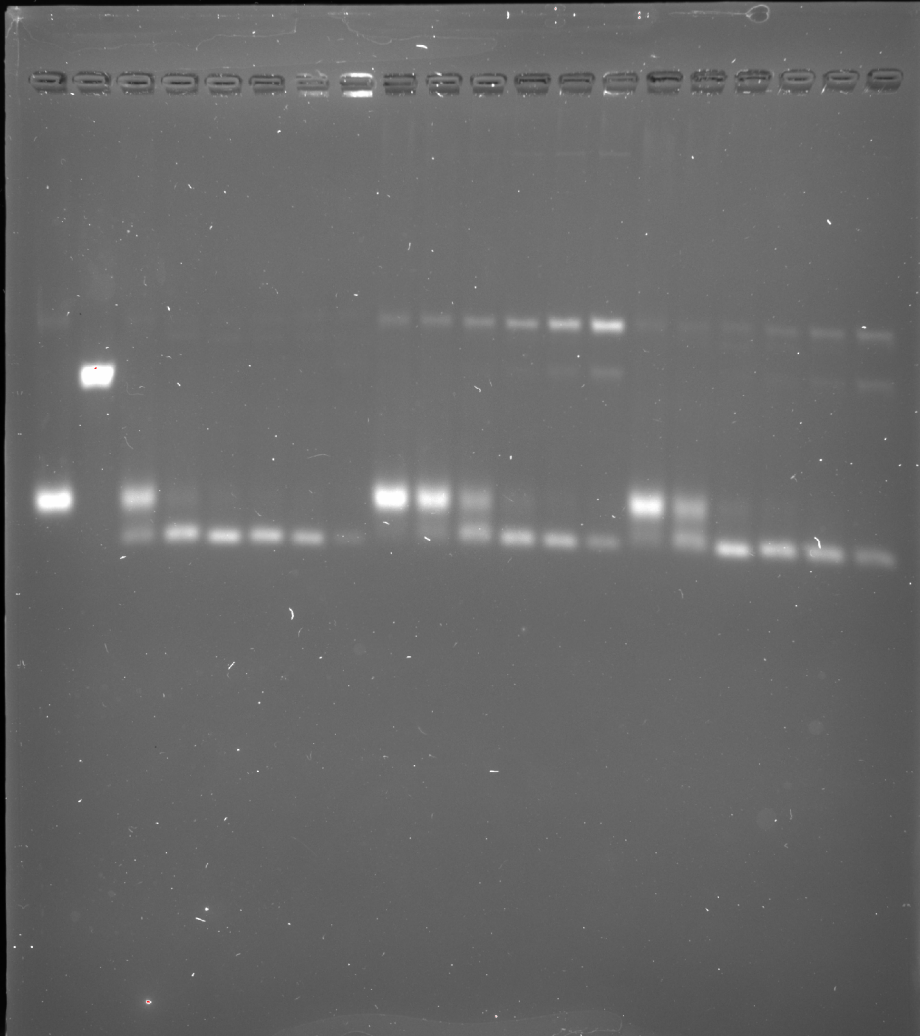

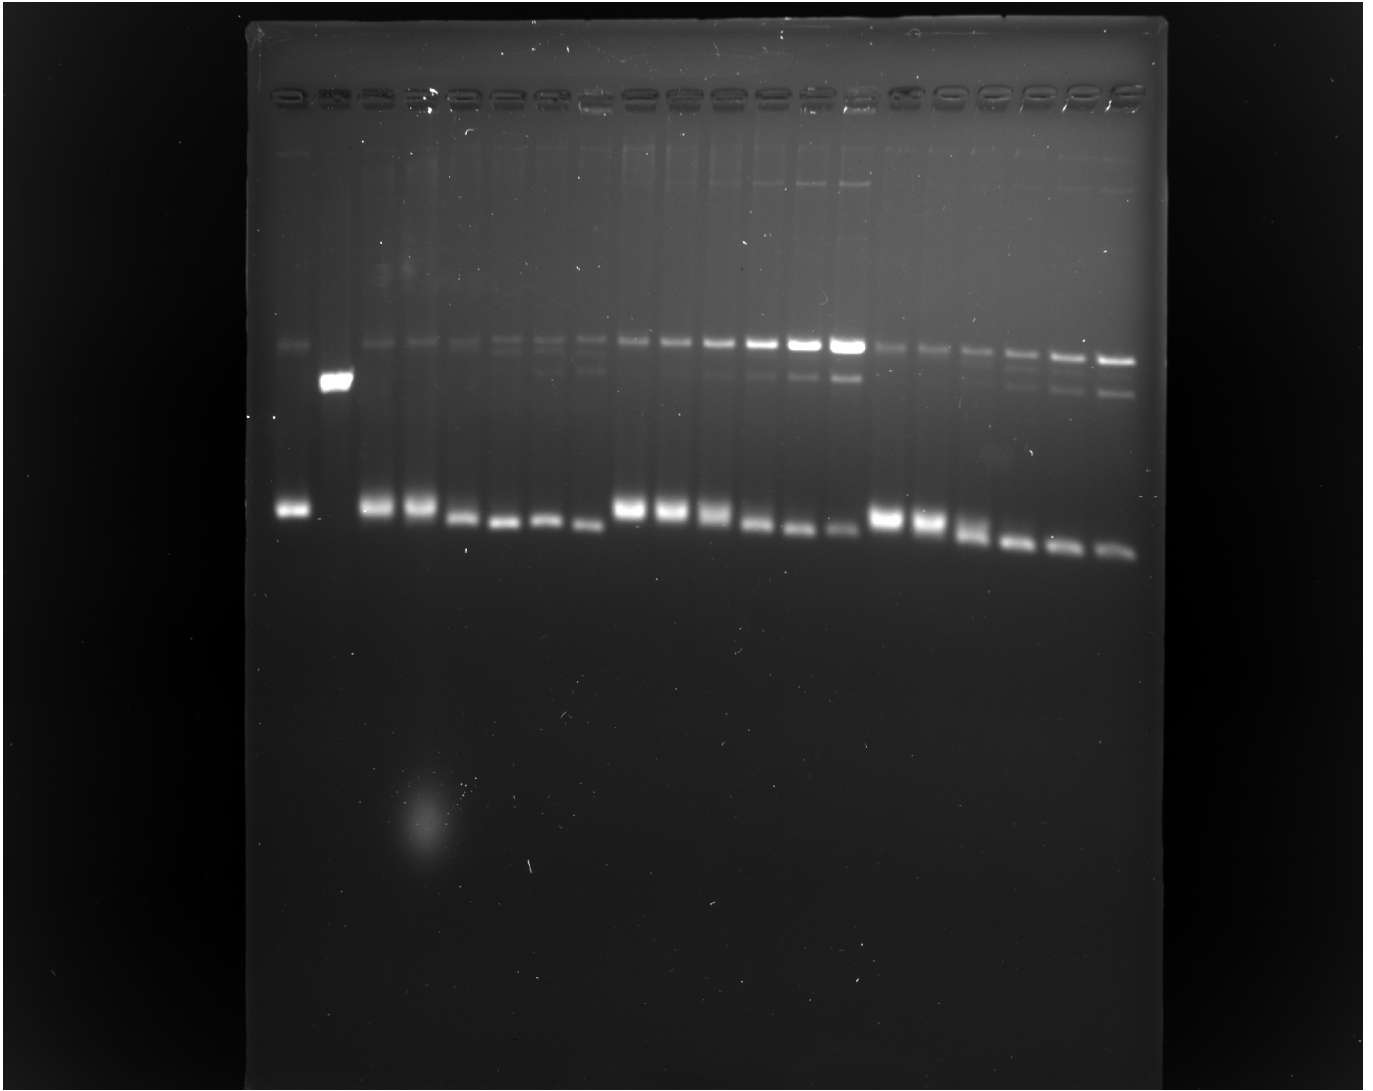

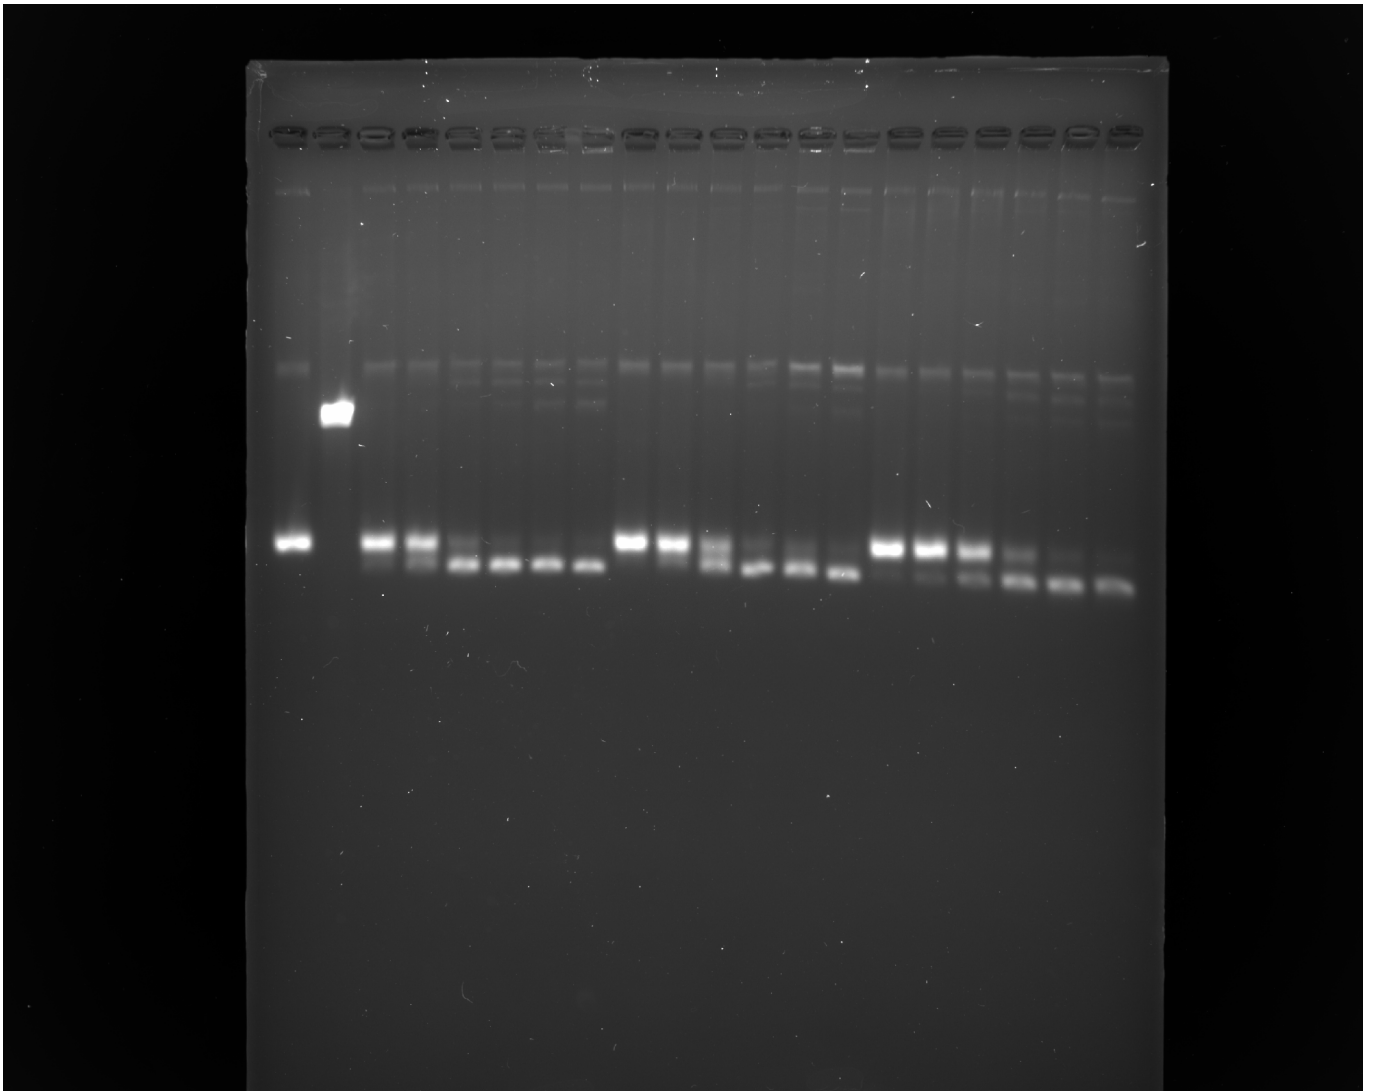



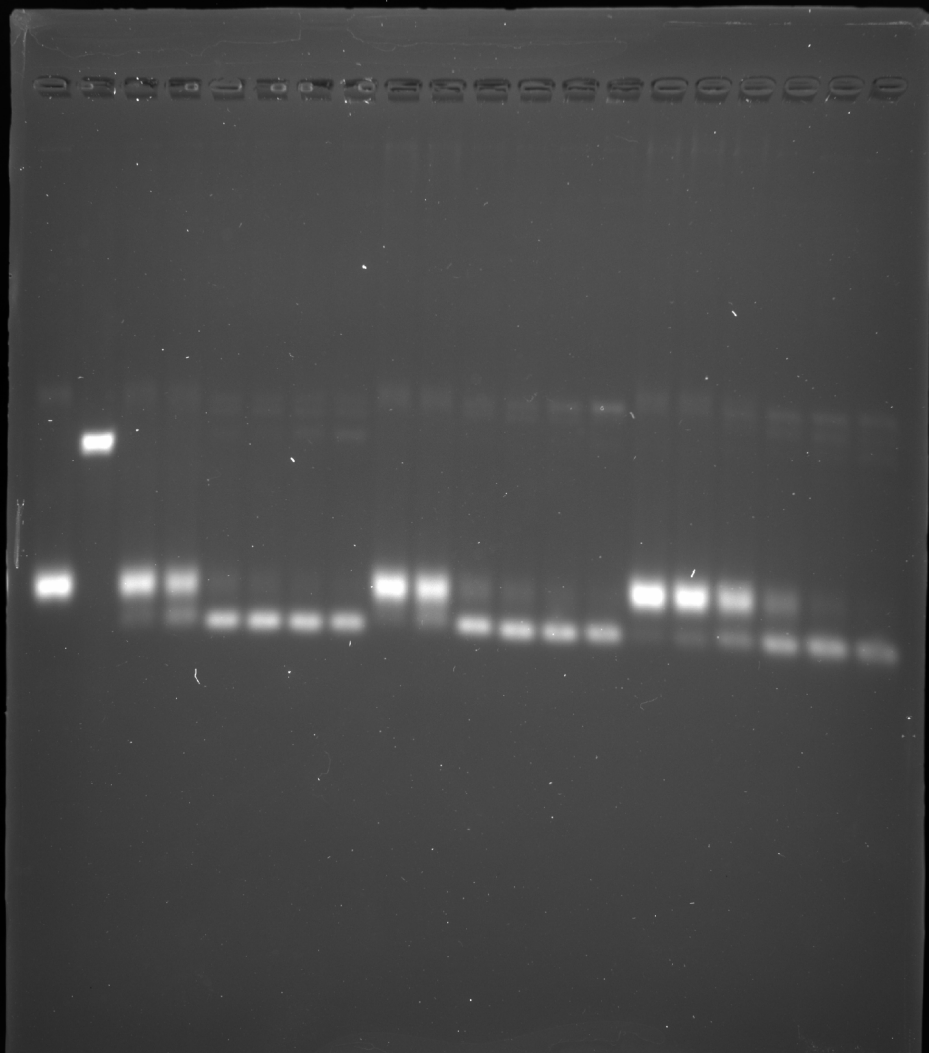

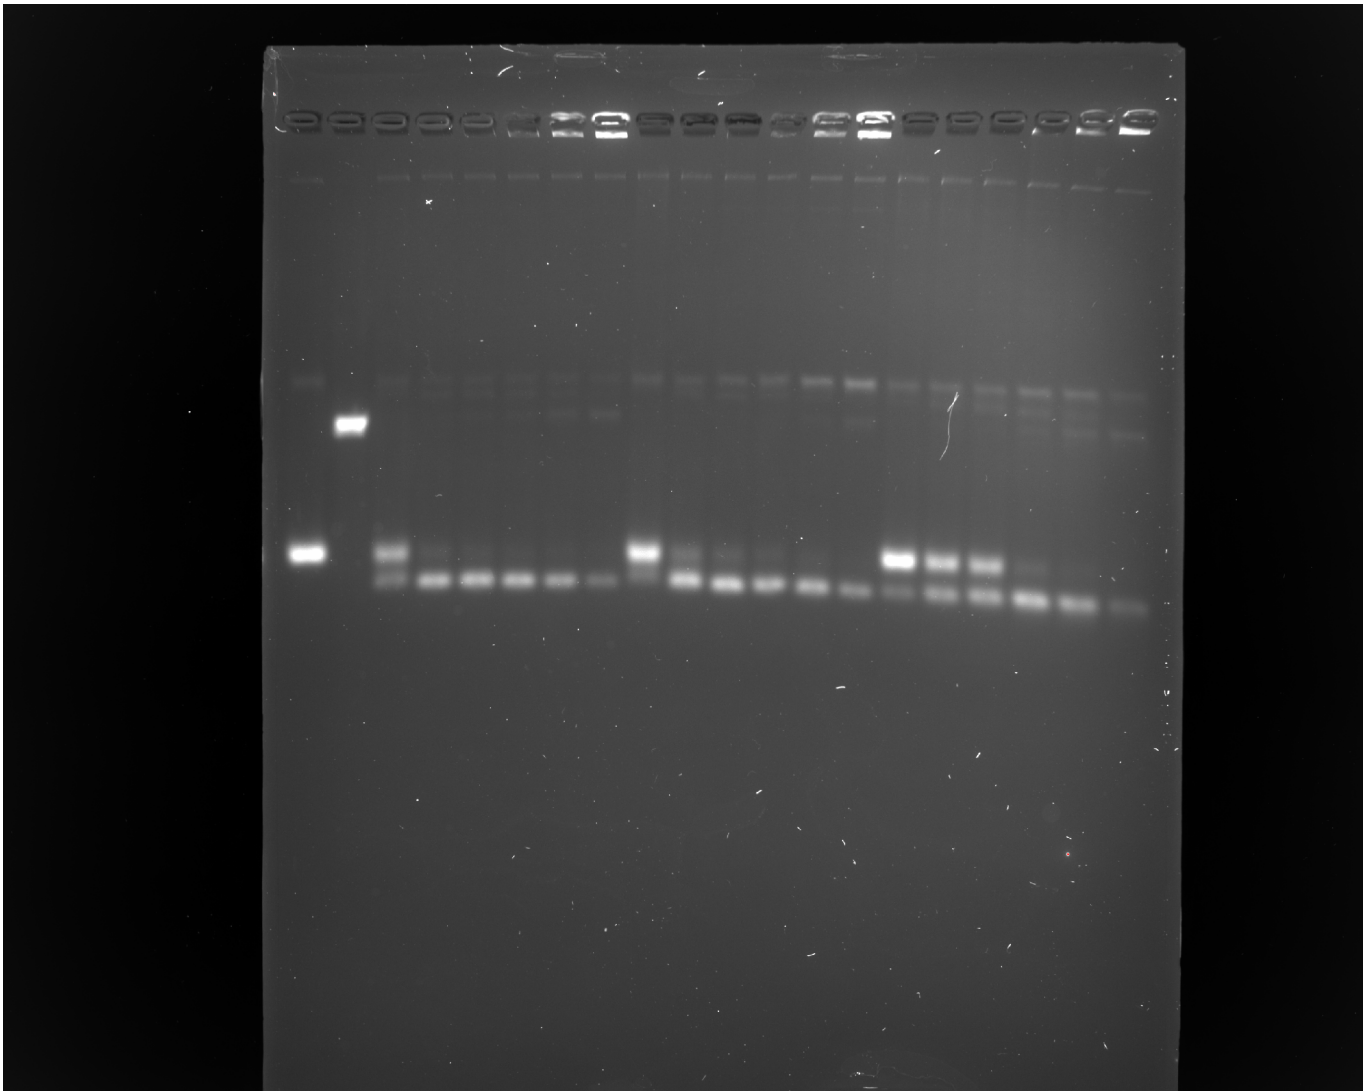

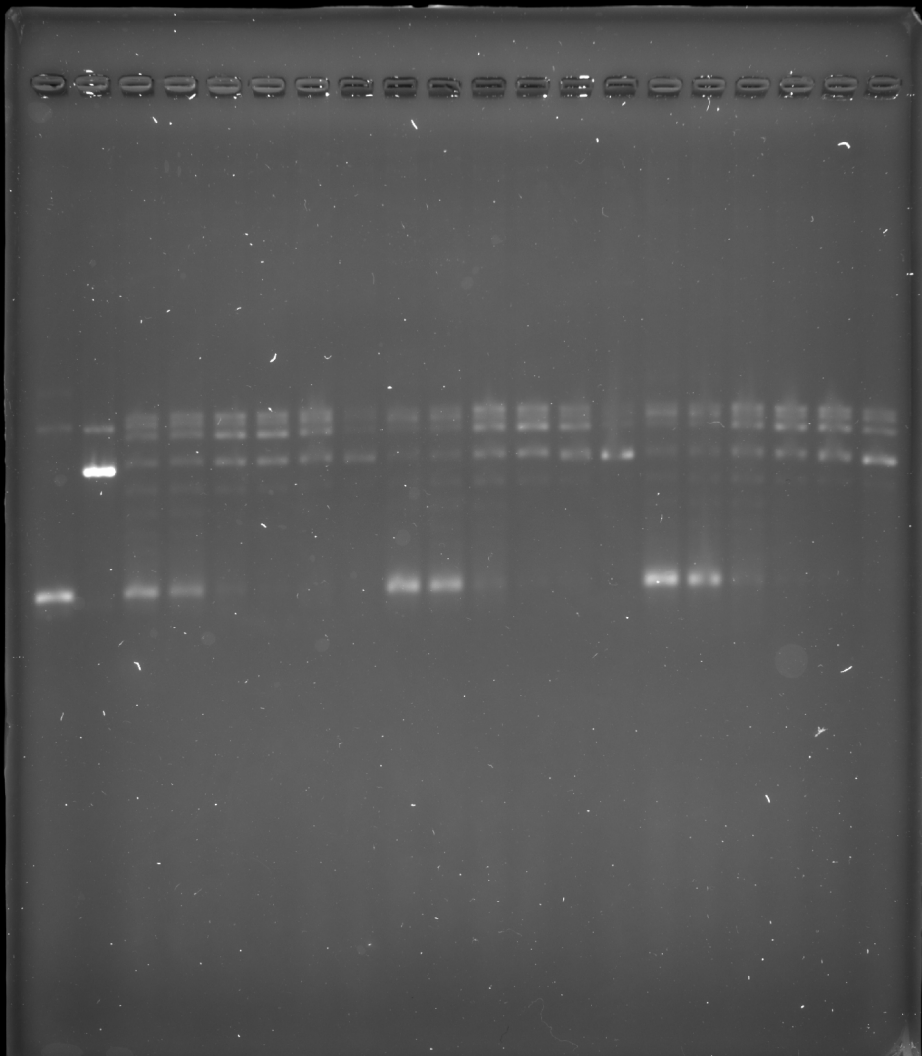

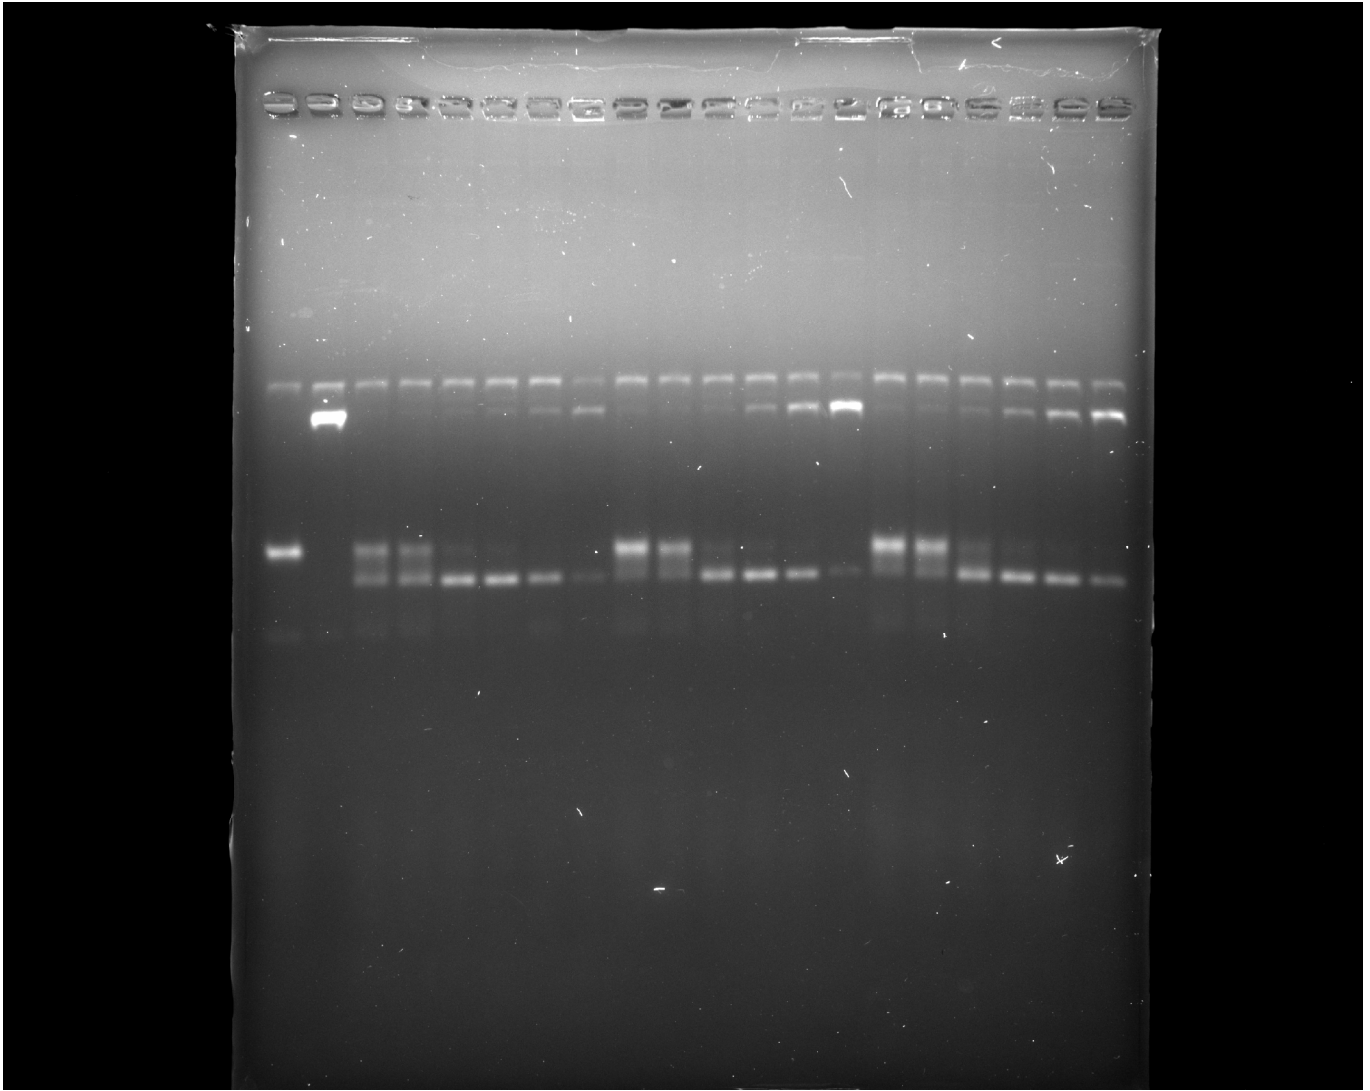

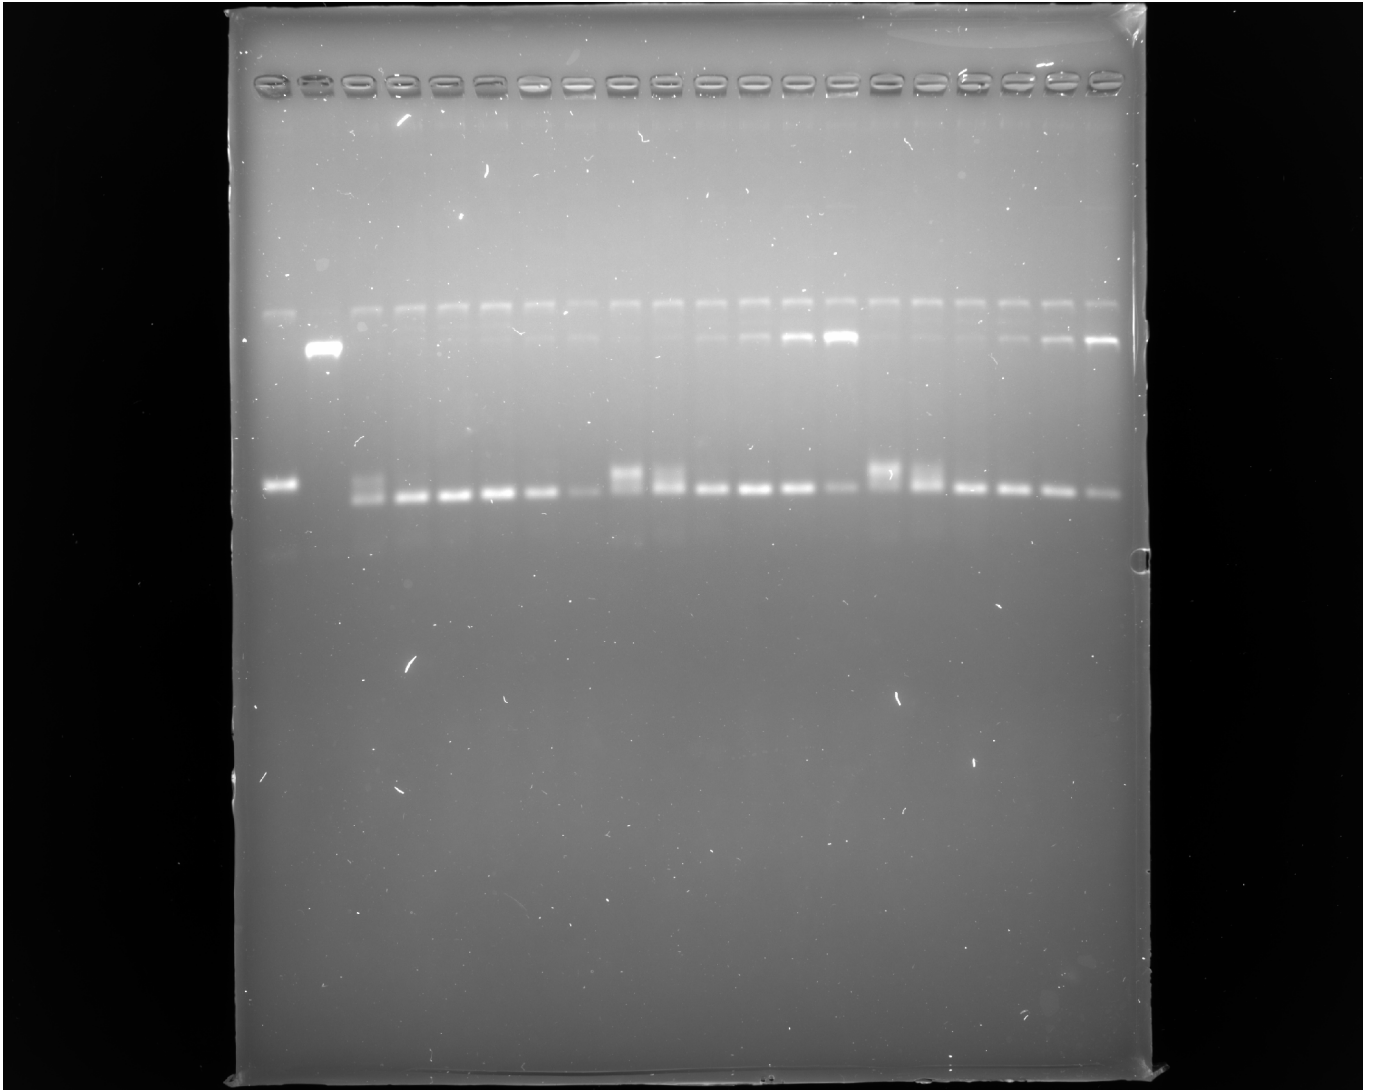

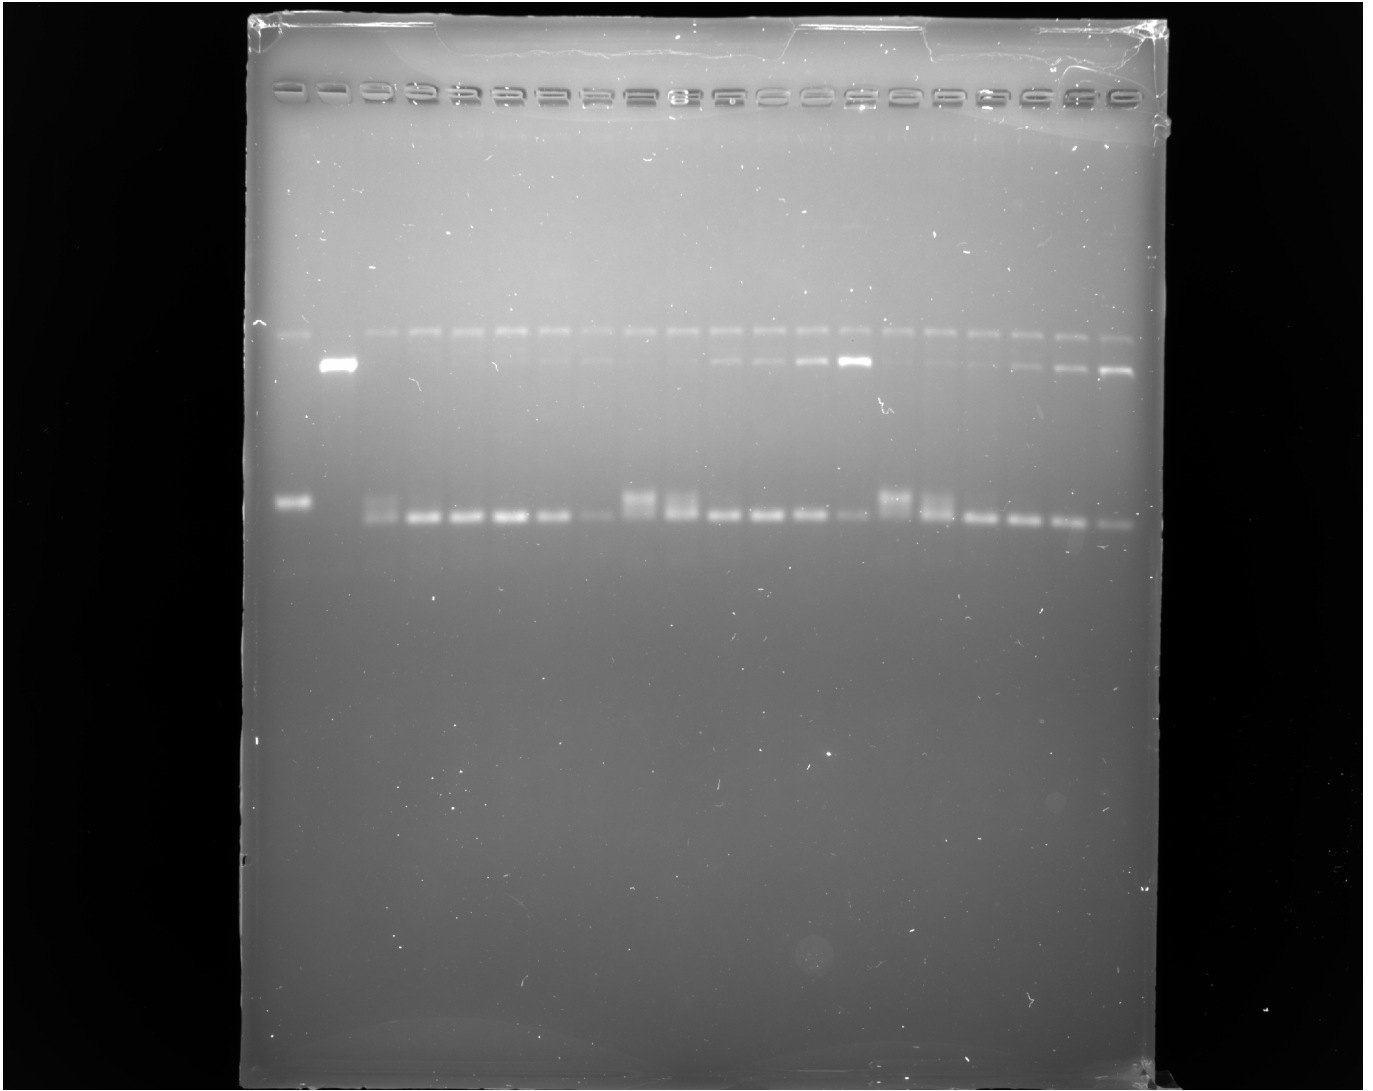



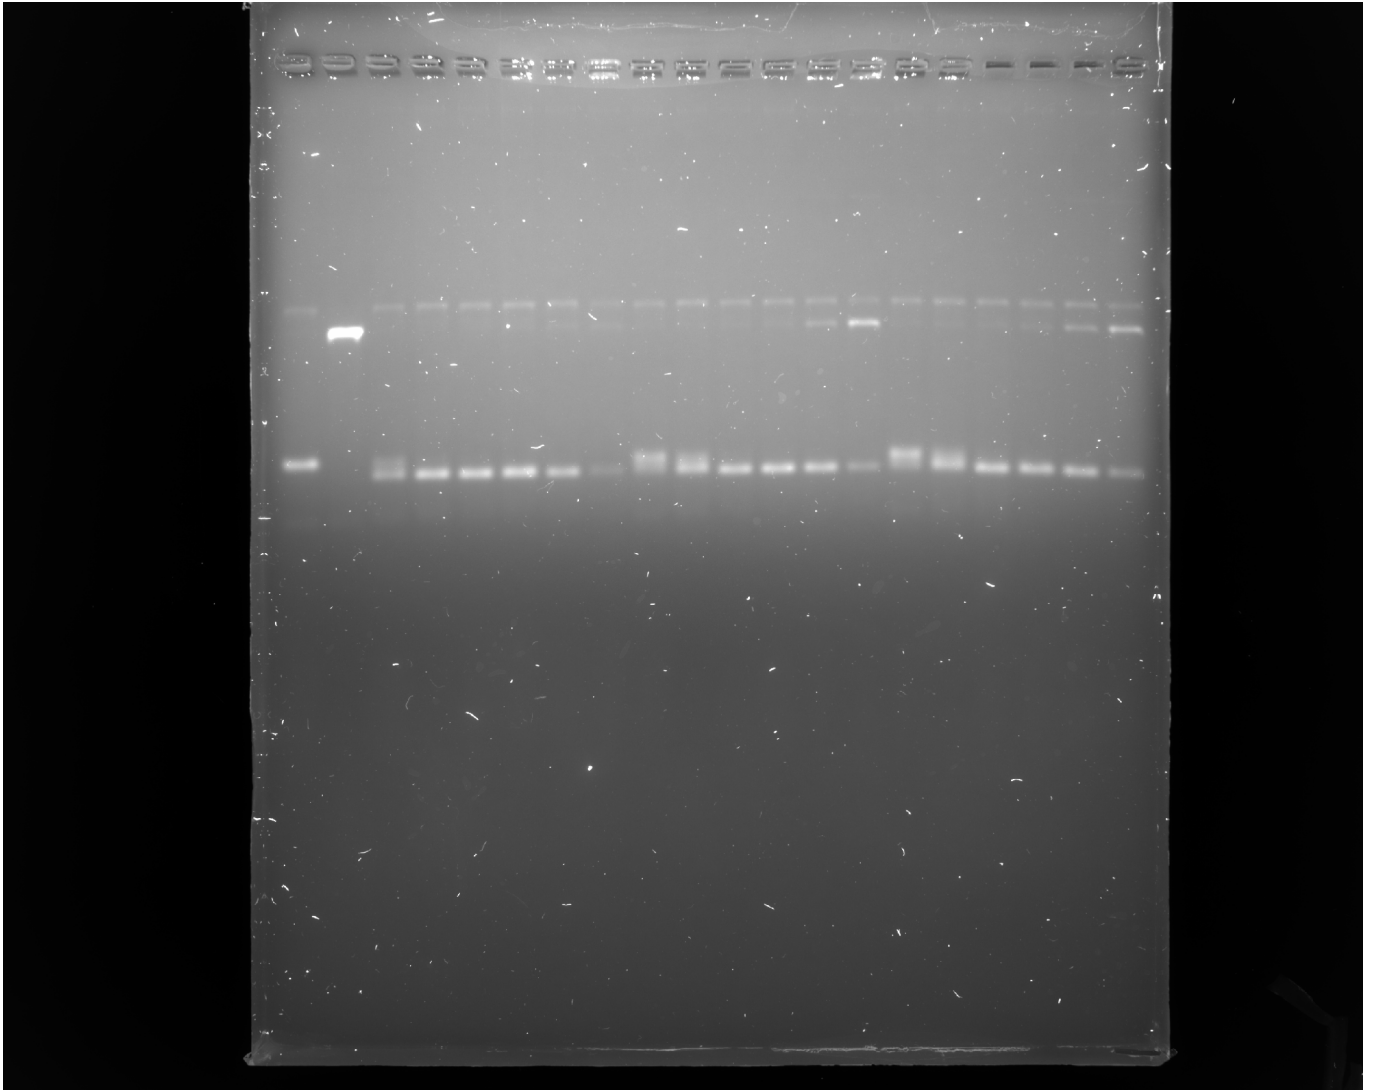



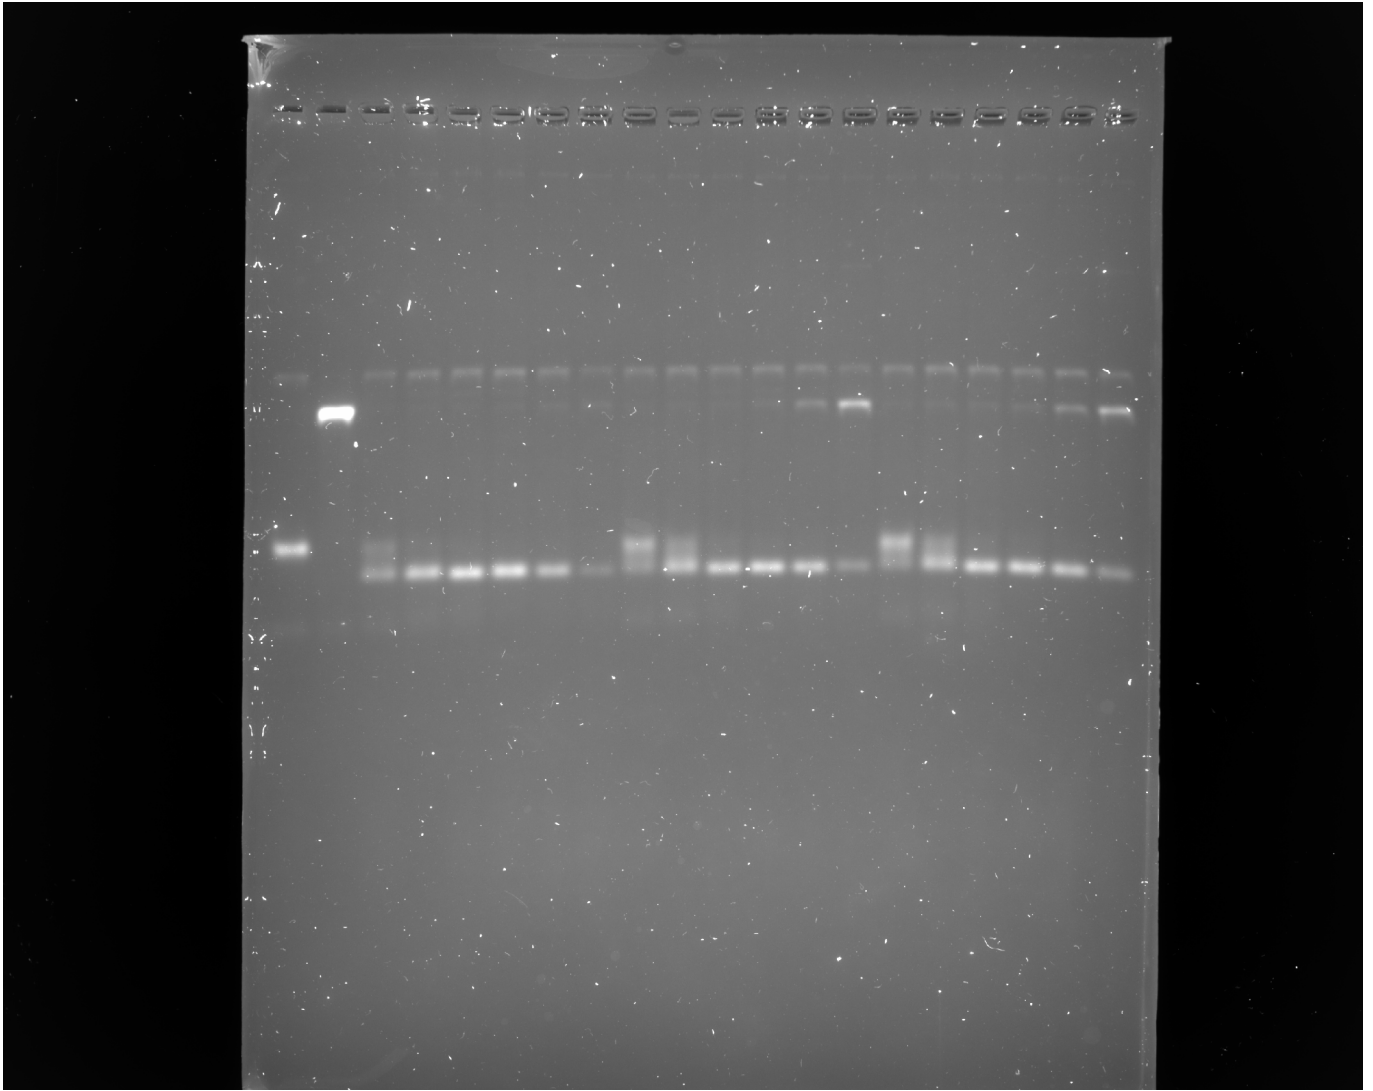

Supplement: pnas.2302064120.sd01.pdf [file pnas.2302064120.sd01.pdf]
